# Supplementary material for: Unveiling heteroatom-containing carbon dots from soil bacterial extracellular metabolites and their application in toxic Cr 6+ detection
Source: Royal Society of Chemistry journal article supplement (doi:10.1039/d5en00823a), 2025-11-28
Supplement: d5en00823a1.pdf [file d5en00823a1.pdf]

Supporting Information For:

**Unveiling Heteroatom-Containing Carbon Dots from Soil Bacterial  
Extracellular Metabolites and Their Application in Toxic Cr<sup>6+</sup> Detection**

|                                                                                                                                                                             |
|-----------------------------------------------------------------------------------------------------------------------------------------------------------------------------|
| <b>Contents</b>                                                                                                                                                             |
| 2S1. Instruments                                                                                                                                                            |
| Figure S1. Phylogenetic tree of the isolated bacterium through neighbour-joining method showing most similarity with <i>Bacillus pseudomycoides</i> strain NBRC 101232      |
| Figure S2. (a) EDS layered image, (b) EDS elemental mapping of the elements present in the CDs                                                                              |
| Figure S3. Fluorescent stability test of CDs under various temperatures ranging from 4°C to 40°C.                                                                           |
| Figure S4. Fluorescence response of CDs upon addition of 100 µL 2mM Pb <sup>2+</sup> solution and 100 µL 2 mM Cr <sup>6+</sup> solution ( $\lambda_{\text{ex}}$ = 350 nm).  |
| Figure S5. Fluorescence response of CDs upon addition of 100 µL 2mM As <sup>5+</sup> solution and 100 µL 2 mM Cr <sup>6+</sup> solution ( $\lambda_{\text{ex}}$ = 350 nm).  |
| Figure S6. Fluorescence response of CDs upon addition of 100 µL 2mM Fe <sup>2+</sup> solution and 100 µL 2 mM Cr <sup>6+</sup> solution ( $\lambda_{\text{ex}}$ = 350 nm).  |
| Figure S7. Fluorescence response of CDs upon addition of 100 µL 2mM Cd <sup>2+</sup> solution and 100 µL 2 mM Cr <sup>6+</sup> solution ( $\lambda_{\text{ex}}$ = 350 nm).  |
| Figure S8. Fluorescence response of CDs upon addition of 100 µL 2mM Mn <sup>2+</sup> solution and 100 µL 2 mM Cr <sup>6+</sup> solution ( $\lambda_{\text{ex}}$ = 350 nm).  |
| Figure S9. Fluorescence response of CDs upon addition of 100 µL 2mM Cr <sup>3+</sup> solution and 100 µL 2 mM Cr <sup>6+</sup> solution ( $\lambda_{\text{ex}}$ = 350 nm).  |
| Figure S10. Fluorescence response of CDs upon addition of 100 µL 2mM Co <sup>2+</sup> solution and 100 µL 2 mM Cr <sup>6+</sup> solution ( $\lambda_{\text{ex}}$ = 350 nm). |
| Figure S11. Fluorescence response of CDs upon addition of 100 µL 2mM K <sup>+</sup> solution and 100 µL 2 mM Cr <sup>6+</sup> solution ( $\lambda_{\text{ex}}$ = 350 nm).   |
| Figure S12. Fluorescence response of CDs upon addition of 100 µL 2mM Ca <sup>2+</sup> solution and 100 µL 2 mM Cr <sup>6+</sup> solution ( $\lambda_{\text{ex}}$ = 350 nm). |
| Figure S13. Fluorescence response of CDs upon addition of 100 µL 2mM Al <sup>3+</sup> solution and 100 µL 2 mM Cr <sup>6+</sup> solution ( $\lambda_{\text{ex}}$ = 350 nm). |

|                                                                                                                                                                                                                    |
|--------------------------------------------------------------------------------------------------------------------------------------------------------------------------------------------------------------------|
| Figure S14. Fluorescence response of CDs upon addition of 100 $\mu\text{L}$ 2mM $\text{Zn}^{2+}$ solution and 100 $\mu\text{L}$ 2 mM $\text{Cr}^{6+}$ solution ( $\lambda_{\text{ex}}=350\text{ nm}$ ).            |
| Figure S15. Fluorescence response of CDs upon addition of 100 $\mu\text{L}$ 2mM $\text{Mg}^{2+}$ solution and 100 $\mu\text{L}$ 2 mM $\text{Cr}^{6+}$ solution ( $\lambda_{\text{ex}}=350\text{ nm}$ ).            |
| Figure S16. Fluorescence response of CDs upon addition of 100 $\mu\text{L}$ 2mM $\text{Ba}^{2+}$ solution and 100 $\mu\text{L}$ 2 mM $\text{Cr}^{6+}$ solution ( $\lambda_{\text{ex}}=350\text{ nm}$ ).            |
| Figure S17. Fluorescence response of CDs upon addition of 100 $\mu\text{L}$ 2mM $\text{Ag}^+$ solution and 100 $\mu\text{L}$ 2 mM $\text{Cr}^{6+}$ solution ( $\lambda_{\text{ex}}=350\text{ nm}$ ).               |
| Figure S18. Fluorescence response of CDs upon addition of 100 $\mu\text{L}$ 2mM $\text{Ni}^{2+}$ solution and 100 $\mu\text{L}$ 2 mM $\text{Cr}^{6+}$ solution ( $\lambda_{\text{ex}}=350\text{ nm}$ ).            |
| Figure S19. Fluorescence response of CDs upon addition of 100 $\mu\text{L}$ 2mM $\text{Hg}^{2+}$ solution and 100 $\mu\text{L}$ 2 mM $\text{Cr}^{6+}$ solution ( $\lambda_{\text{ex}}=350\text{ nm}$ ).            |
| Figure S20. Fluorescence response of CDs upon addition of 100 $\mu\text{L}$ 2mM $\text{Cu}^{2+}$ solution and 100 $\mu\text{L}$ 2 mM $\text{Cr}^{6+}$ solution ( $\lambda_{\text{ex}}=350\text{ nm}$ ).            |
| Figure S21. Fluorescence response of CDs upon addition of 100 $\mu\text{L}$ 2mM $\text{Fe}^{3+}$ solution and 100 $\mu\text{L}$ 2 mM $\text{Cr}^{6+}$ solution ( $\lambda_{\text{ex}}=350\text{ nm}$ ).            |
| Figure S22. Fluorescence response of CDs upon addition of 100 $\mu\text{L}$ 2mM $\text{PO}_4^{3-}$ solution and 100 $\mu\text{L}$ 2 mM $\text{Cr}^{6+}$ solution ( $\lambda_{\text{ex}}=350\text{ nm}$ ).          |
| Figure S23. Fluorescence response of CDs upon addition of 100 $\mu\text{L}$ 2mM $\text{H}_2\text{PO}_4^-$ solution and 100 $\mu\text{L}$ 2 mM $\text{Cr}^{6+}$ solution ( $\lambda_{\text{ex}}=350\text{ nm}$ ).   |
| Figure S24. Fluorescence response of CDs upon addition of 100 $\mu\text{L}$ 2mM $\text{F}^-$ solution and 100 $\mu\text{L}$ 2 mM $\text{Cr}^{6+}$ solution ( $\lambda_{\text{ex}}=350\text{ nm}$ ).                |
| Figure S25. Fluorescence response of CDs in PBS upon addition of 100 $\mu\text{L}$ 2mM $\text{HCO}_3^-$ solution and 100 $\mu\text{L}$ 2 mM $\text{Cr}^{6+}$ solution ( $\lambda_{\text{ex}}=350\text{ nm}$ ).     |
| Figure S26. Fluorescence response of CDs in PBS upon addition of 100 $\mu\text{L}$ 2mM $\text{SO}_4^{2-}$ solution and 100 $\mu\text{L}$ 2 mM $\text{Cr}^{6+}$ solution ( $\lambda_{\text{ex}}=350\text{ nm}$ ).   |
| Figure S27. Fluorescence response of CDs in PBS upon addition of 100 $\mu\text{L}$ 2mM $\text{Br}^-$ solution and 100 $\mu\text{L}$ 2 mM $\text{Cr}^{6+}$ solution ( $\lambda_{\text{ex}}=350\text{ nm}$ ).        |
| Figure S28. Fluorescence response of CDs upon addition of 100 $\mu\text{L}$ 2mM $\text{HPO}_4^{2-}$ solution and 100 $\mu\text{L}$ 2 mM $\text{Cr}^{6+}$ solution ( $\lambda_{\text{ex}}=350\text{ nm}$ ).         |
| Figure S29. Fluorescence response of CDs upon addition of 100 $\mu\text{L}$ 2mM $\text{C}_2\text{O}_4^{2-}$ solution and 100 $\mu\text{L}$ 2 mM $\text{Cr}^{6+}$ solution ( $\lambda_{\text{ex}}=350\text{ nm}$ ). |
| Figure S30. Fluorescence response of CDs upon addition of 100 $\mu\text{L}$ 2mM $\text{Cl}^-$ solution and 100 $\mu\text{L}$ 2 mM $\text{Cr}^{6+}$ solution ( $\lambda_{\text{ex}}=350\text{ nm}$ ).               |

|                                                                                                                                                                                                           |
|-----------------------------------------------------------------------------------------------------------------------------------------------------------------------------------------------------------|
| Figure S31. Fluorescence response of CDs upon addition of 100 $\mu\text{L}$ 2mM $\text{I}^-$ solution and 100 $\mu\text{L}$ 2 mM $\text{Cr}^{6+}$ solution ( $\lambda_{\text{ex}}=350\text{ nm}$ ).       |
| Figure S32. Fluorescence response of CDs upon addition of 100 $\mu\text{L}$ 2mM $\text{CO}_3^{2-}$ solution and 100 $\mu\text{L}$ 2 mM $\text{Cr}^{6+}$ solution ( $\lambda_{\text{ex}}=350\text{ nm}$ ). |
| Figure S33. Percentage of fluorescence quenching in CDs upon addition of various metal ions.                                                                                                              |
| Figure S34. Fluorescence response of CDs upon addition of humic acid (25 mg/L) solution and $\text{Cr}^{6+}$ (25 mg/L) solution ( $\lambda_{\text{ex}}=350\text{ nm}$ ).                                  |
| Figure S35. Interference study of humic acid in the sensing of $\text{Cr}^{6+}$ by NB24@CDs.                                                                                                              |
| Figure S36. Stern-Volmer plot for fluorescence quenching of CDs against $\text{Cr}^{6+}$ concentration in micromolar                                                                                      |
| Table S1. $K_{SV}$ obtained from Stern-Volmer plots at different temperatures, indicating decreasing values with increasing temperatures ( $n = 3$ ).                                                     |
| Table S2. Determination of $\text{Cr}^{6+}$ in real samples using CDs as fluorescent probe ( $n = 3$ ).                                                                                                   |
| Table S3. Comparison of some recently published platforms for the detection of $\text{Cr}^{6+}$                                                                                                           |
| References                                                                                                                                                                                                |

## **2S1. Instruments**

UV–Vis absorbance spectra were recorded using U-3310 UV–Vis spectrophotometer. FTIR spectra were recorded on a Perkin Elmer Spectrum 2 FTIR spectrometer over a frequency range of 4000–400  $\text{cm}^{-1}$ . To analyze the size and morphology of the CDs, Jeol 2100F Field Emission Transmission Electron Microscope (FETEM). A droplet of dilute CDs solution was placed on a copper grid and left to dry overnight in a desiccator. Horiba Scientific Fluoromax-4 Spectrofluorometer was utilized to record and analyze the fluorescent intensities using 0.8mg/1mL. The crystalline or amorphous nature of the materials was determined using powder X-ray diffraction (XRD). The analysis was conducted with a Rigaku SmartLab 9 kW X-ray diffractometer equipped with  $\text{CuK}\alpha$  radiation ( $\lambda = 1.54 \text{ \AA}$ ) over a  $2\theta$  range of 2–60 degrees. The elemental analysis of the material was executed by Field Emission Scanning Electron Microscope (FESEM) with Element EDS Detector, Make: Zeiss, Model: Sigma 300. Zeta potential was analysed using Aton Paar particle analyzer Litesizer 500. The Surface elemental composition was further confirmed through automated ultra-high vacuum (UHV) X-ray photoelectron spectroscopy, Model: Verse probell.

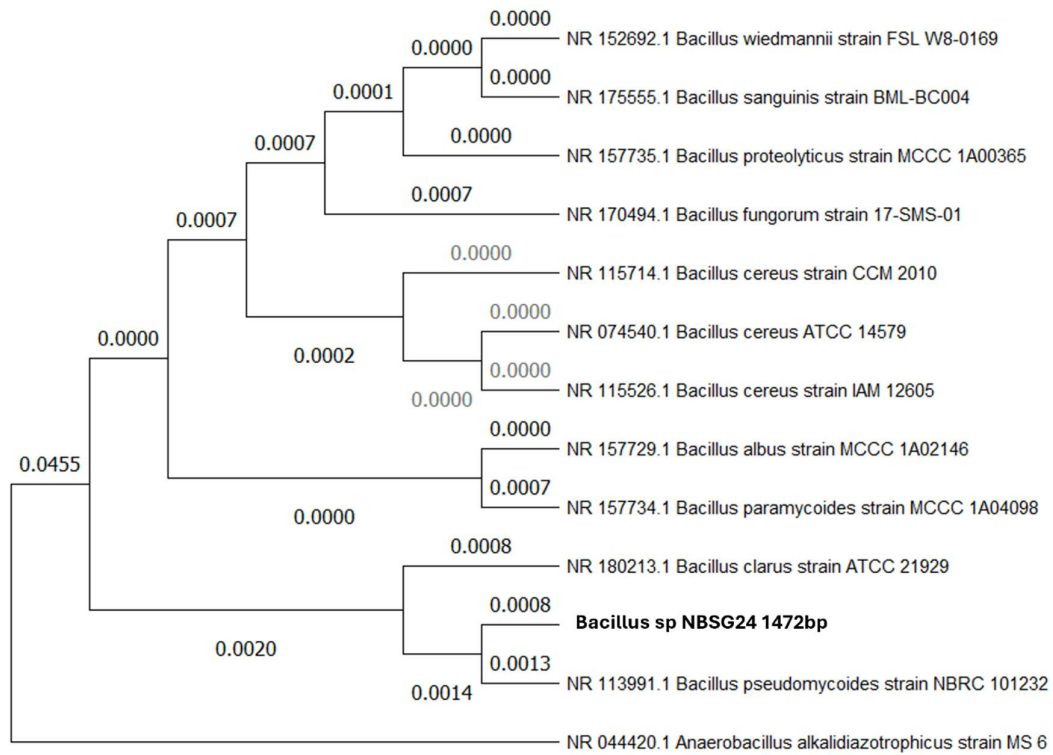

Figure S1. Phylogenetic tree of the isolated bacterium after 16S rRNA sequencing obtained through the neighbour-joining method, showing the most similarity with *Bacillus pseudomycooides* strain NBRC 101232.

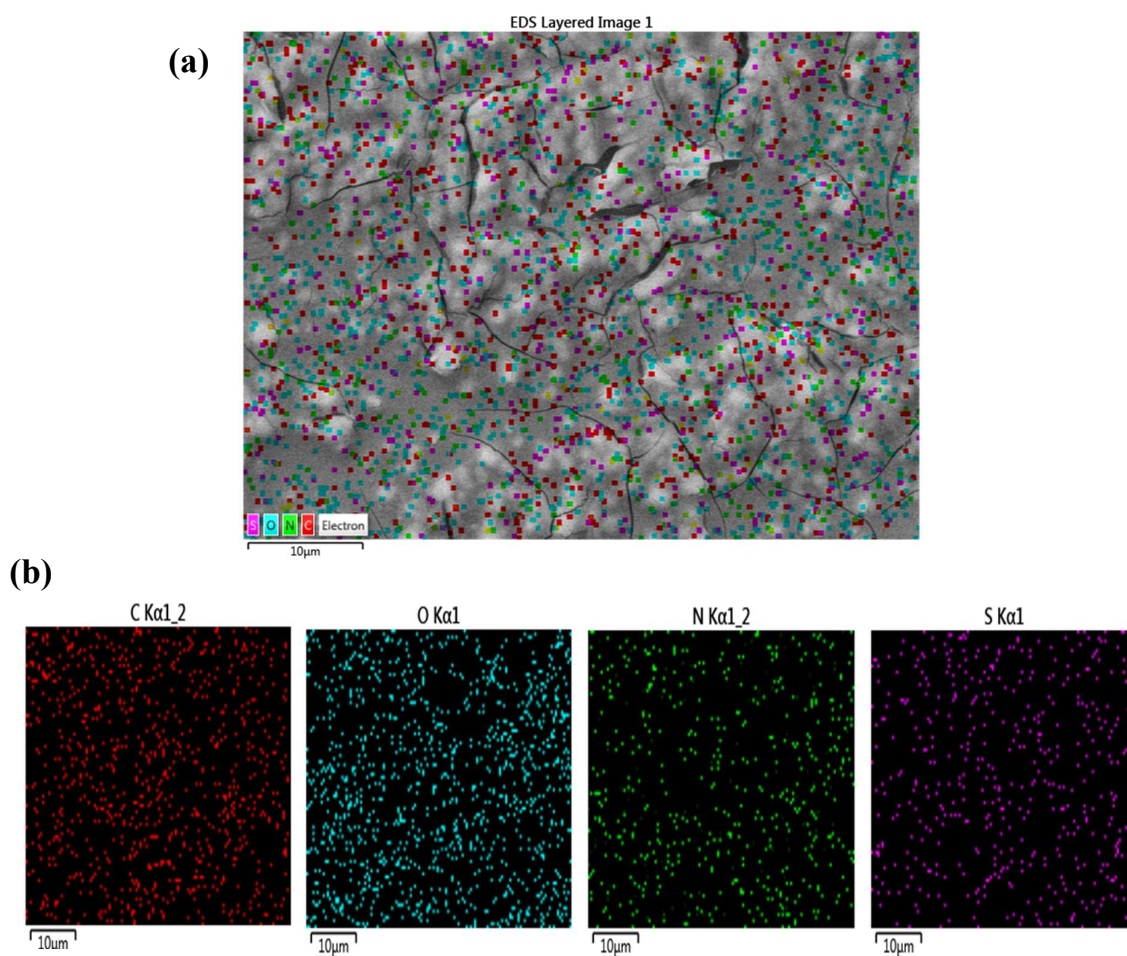

Figure S2. (a) EDS layered image, (b) EDS elemental mapping of the elements present in the CDs.

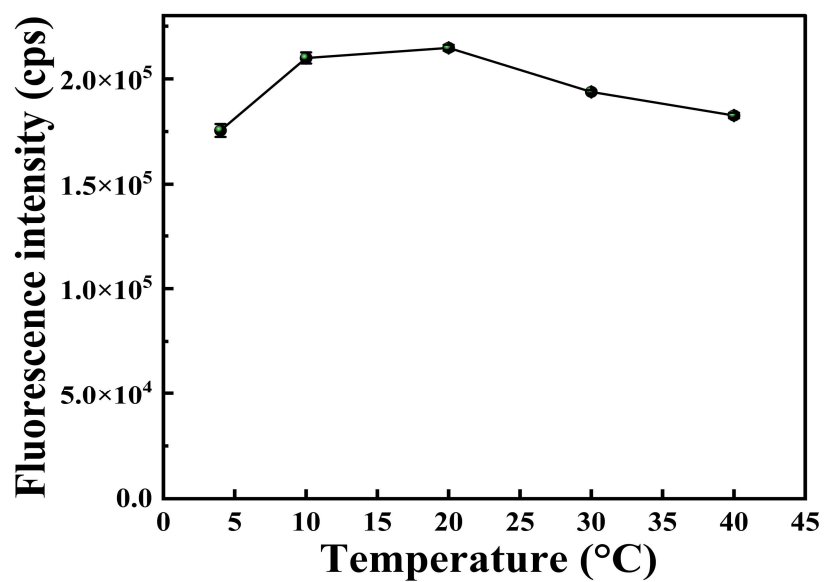

Figure S3. Fluorescence stability test of CDs under various temperatures ranging from 4°C to 40°C.

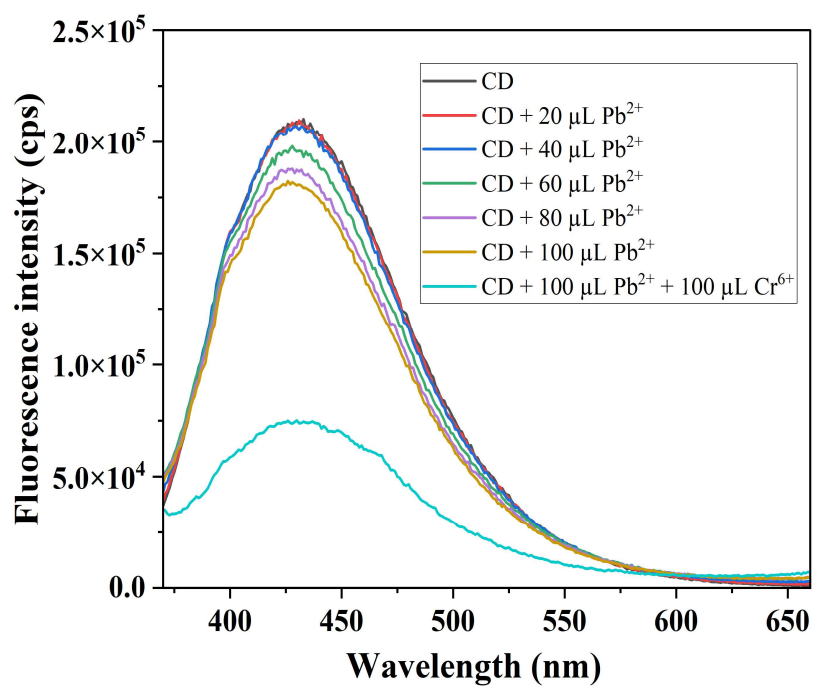

Figure S4. Fluorescence response of CDs upon addition of 100  $\mu\text{L}$  2mM  $\text{Pb}^{2+}$  solution and 100  $\mu\text{L}$  2 mM  $\text{Cr}^{6+}$  solution ( $\lambda_{\text{ex}} = 350 \text{ nm}$ ).

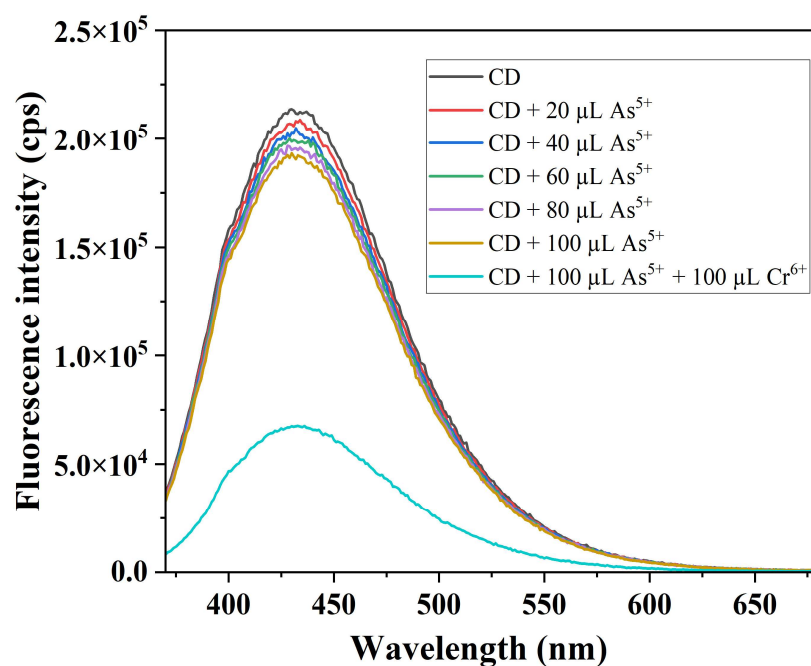

Figure S5. Fluorescence response of CDs upon addition of 100  $\mu\text{L}$  2mM  $\text{As}^{5+}$  solution and 100  $\mu\text{L}$  2 mM  $\text{Cr}^{6+}$  solution ( $\lambda_{\text{ex}} = 350 \text{ nm}$ ).

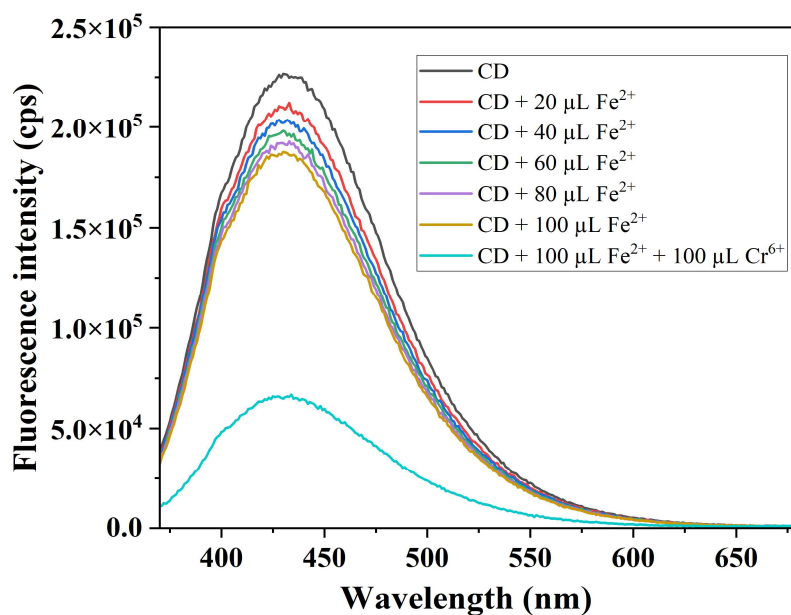

Figure S6. Fluorescence response of CDs upon addition of 100  $\mu\text{L}$  2mM  $\text{Fe}^{2+}$  solution and 100  $\mu\text{L}$  2 mM  $\text{Cr}^{6+}$  solution ( $\lambda_{\text{ex}} = 350 \text{ nm}$ ).

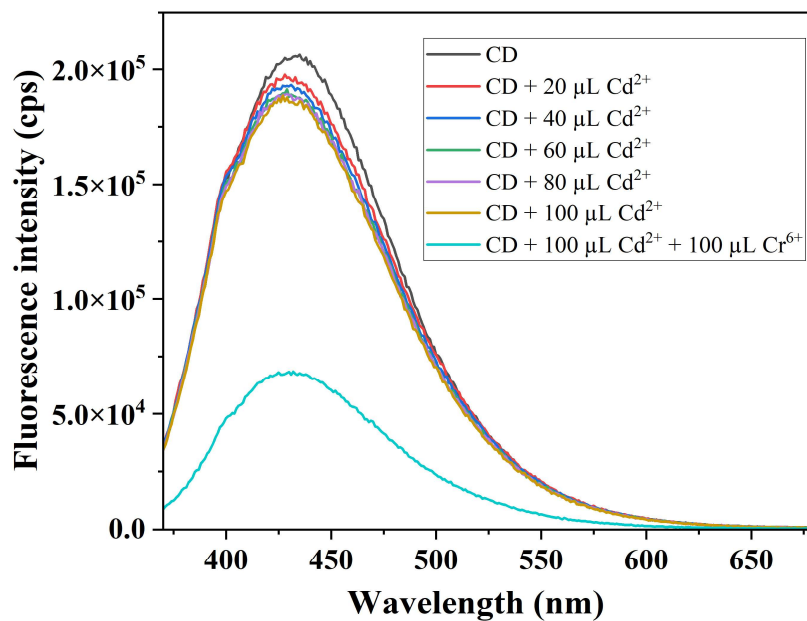

Figure S7. Fluorescence response of CDs upon addition of 100  $\mu\text{L}$  2mM  $\text{Cd}^{2+}$  solution and 100  $\mu\text{L}$  2 mM  $\text{Cr}^{6+}$  solution ( $\lambda_{\text{ex}} = 350$  nm).

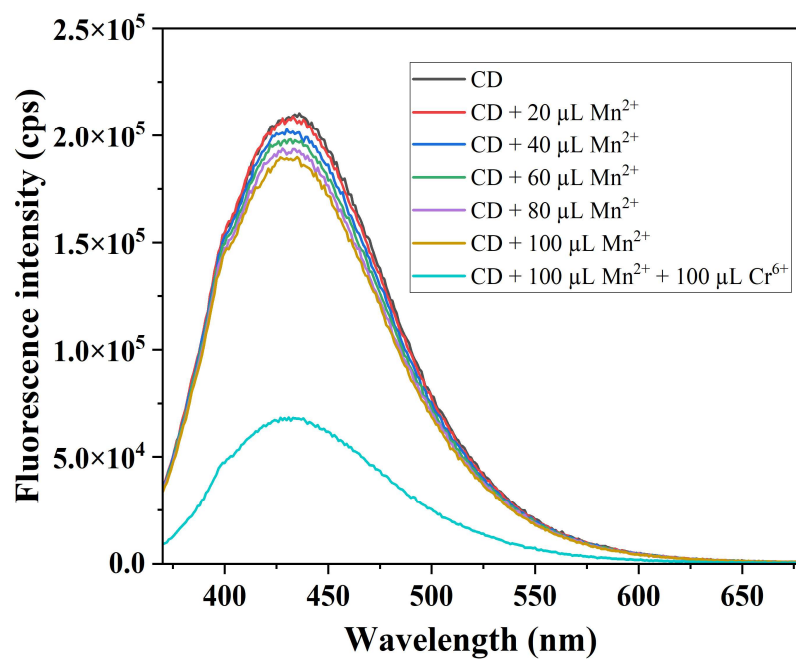

Figure S8. Fluorescence response of CDs upon addition of 100  $\mu\text{L}$  2mM  $\text{Mn}^{2+}$  solution and 100  $\mu\text{L}$  2 mM  $\text{Cr}^{6+}$  solution ( $\lambda_{\text{ex}} = 350$  nm).

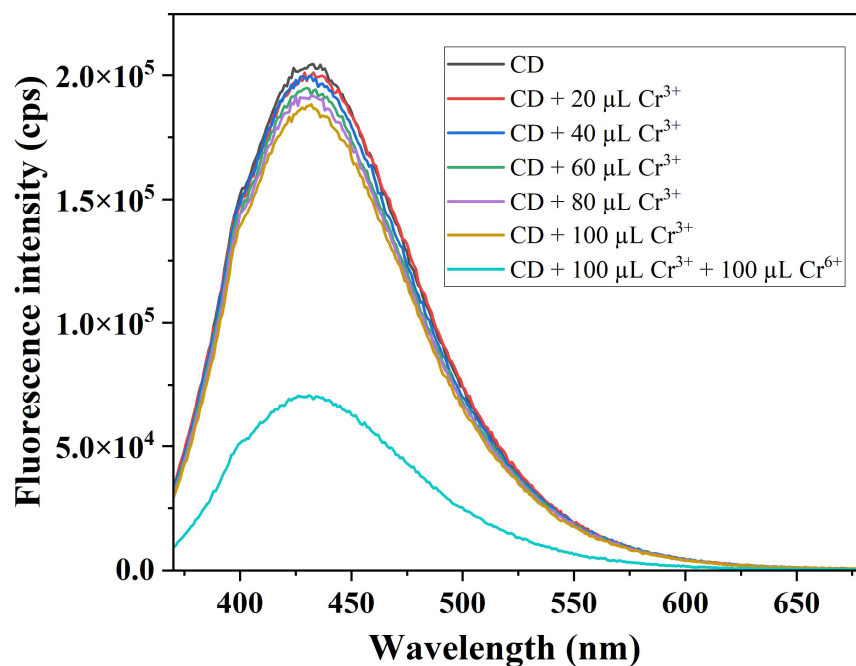

Figure S9. Fluorescence response of CDs upon addition of 100  $\mu\text{L}$  2mM  $\text{Cr}^{3+}$  solution and 100  $\mu\text{L}$  2 mM  $\text{Cr}^{6+}$  solution ( $\lambda_{\text{ex}} = 350$  nm).

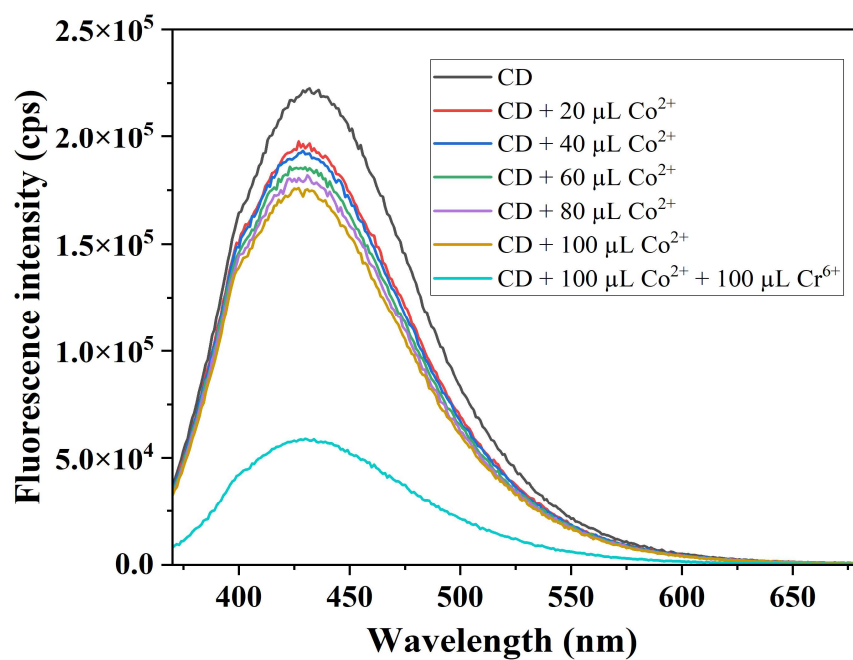

Figure S10. Fluorescence response of CDs upon addition of 100  $\mu\text{L}$  2mM  $\text{Co}^{2+}$  solution and 100  $\mu\text{L}$  2 mM  $\text{Cr}^{6+}$  solution ( $\lambda_{\text{ex}} = 350$  nm).

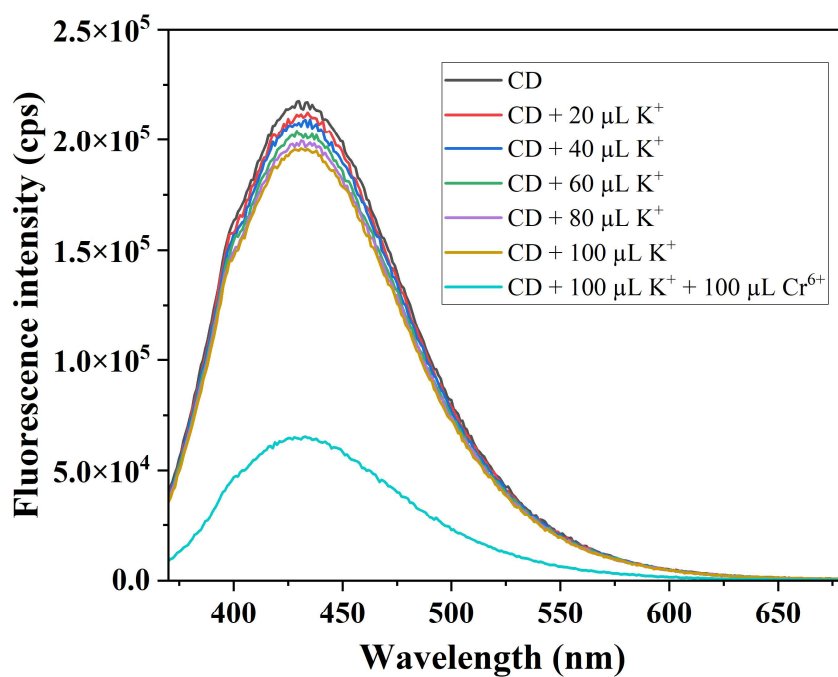

Figure S11. Fluorescence response of CDs upon addition of 100  $\mu\text{L}$  2mM  $\text{K}^+$  solution and 100  $\mu\text{L}$  2 mM  $\text{Cr}^{6+}$  solution ( $\lambda_{\text{ex}} = 350$  nm).

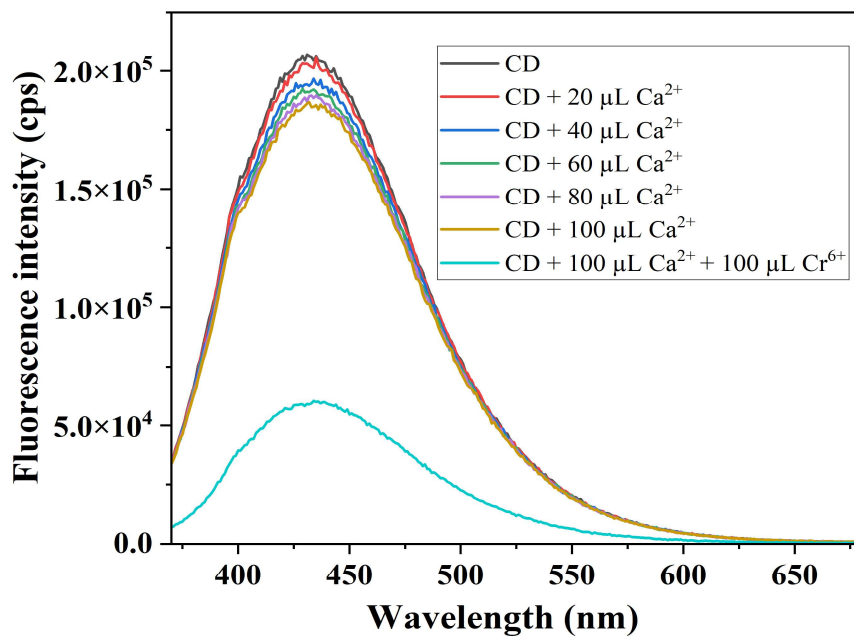

Figure S12. Fluorescence response of CDs upon addition of 100  $\mu\text{L}$  2mM  $\text{Ca}^{2+}$  solution and 100  $\mu\text{L}$  2 mM  $\text{Cr}^{6+}$  solution ( $\lambda_{\text{ex}} = 350$  nm).

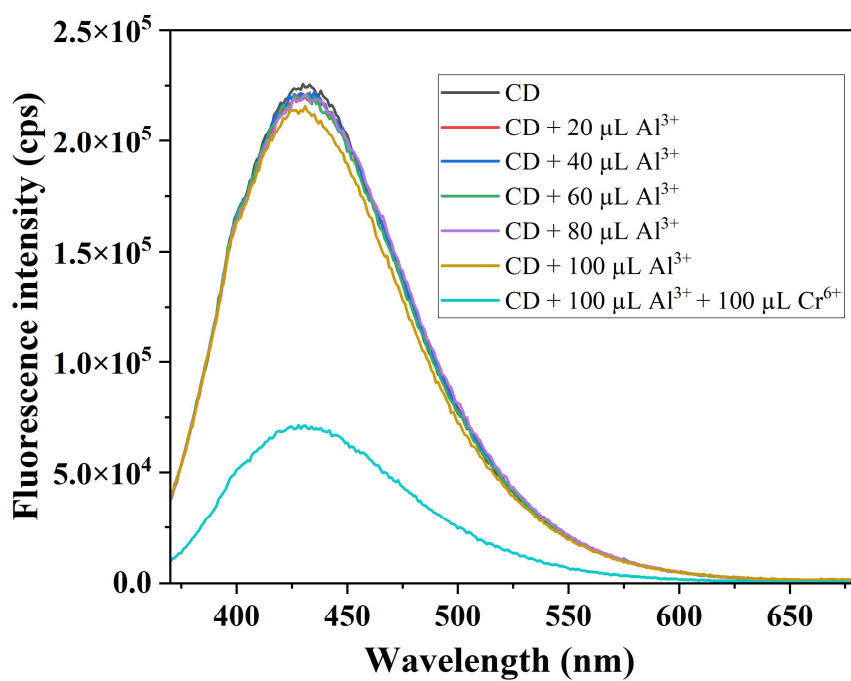

Figure S13. Fluorescence response of CDs upon addition of 100  $\mu\text{L}$  2mM  $\text{Al}^{3+}$  solution and 100  $\mu\text{L}$  2 mM  $\text{Cr}^{6+}$  solution ( $\lambda_{\text{ex}} = 350 \text{ nm}$ ).

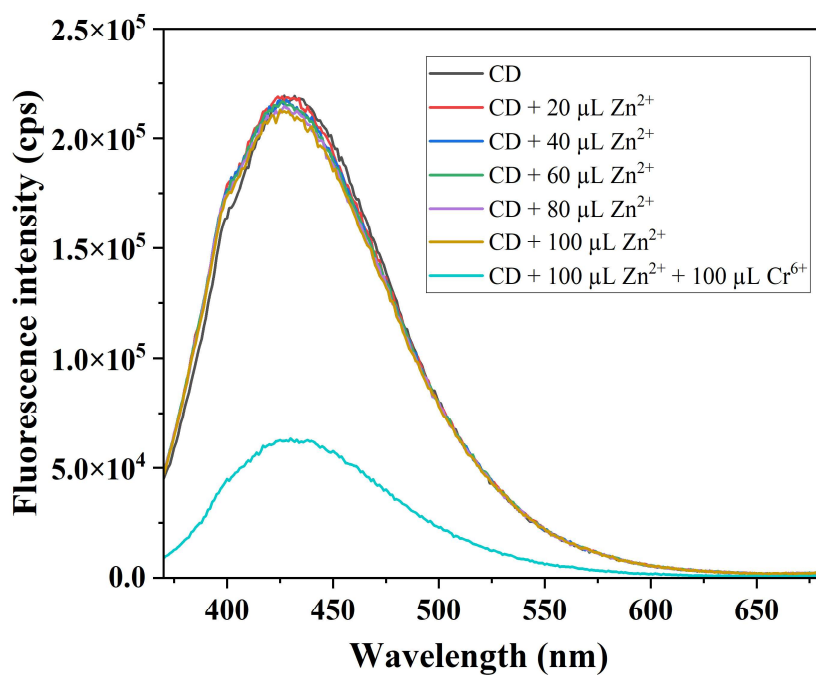

Figure S14. Fluorescence response of CDs upon addition of 100  $\mu\text{L}$  2mM  $\text{Zn}^{2+}$  solution and 100  $\mu\text{L}$  2 mM  $\text{Cr}^{6+}$  solution ( $\lambda_{\text{ex}} = 350 \text{ nm}$ ).

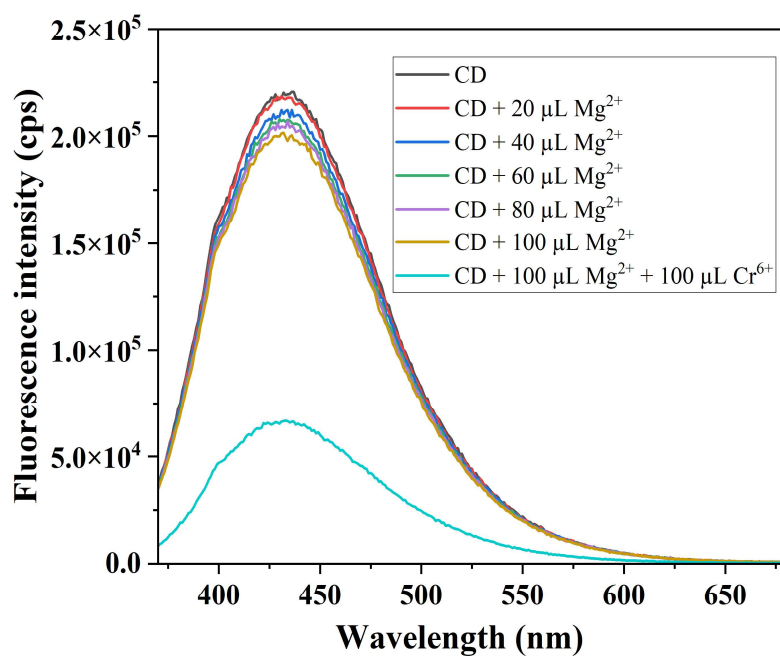

Figure S15. Fluorescence response of CDs upon addition of 100  $\mu\text{L}$  2mM  $\text{Mg}^{2+}$  solution and 100  $\mu\text{L}$  2mM  $\text{Cr}^{6+}$  solution ( $\lambda_{\text{ex}} = 350$  nm).

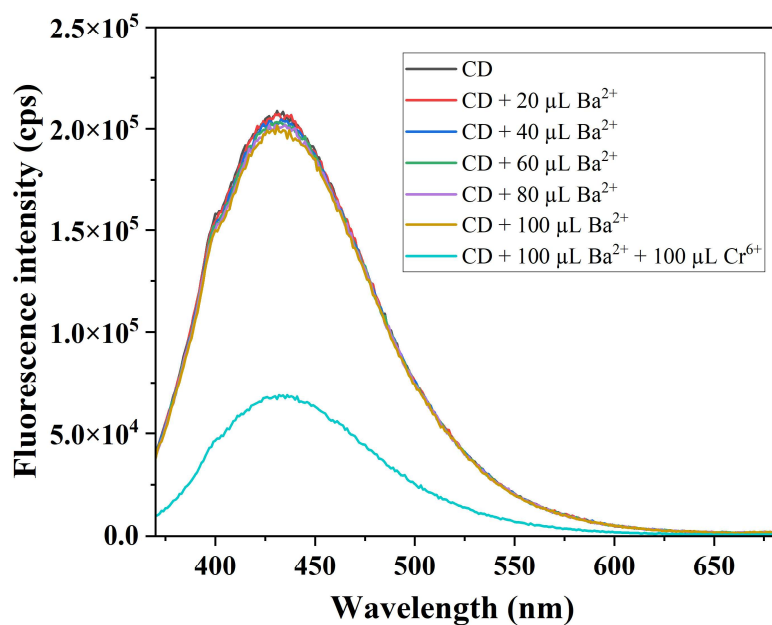

Figure S16. Fluorescence response of CDs upon addition of 100  $\mu\text{L}$  2mM  $\text{Ba}^{2+}$  solution and 100  $\mu\text{L}$  2mM  $\text{Cr}^{6+}$  solution ( $\lambda_{\text{ex}} = 350$  nm).

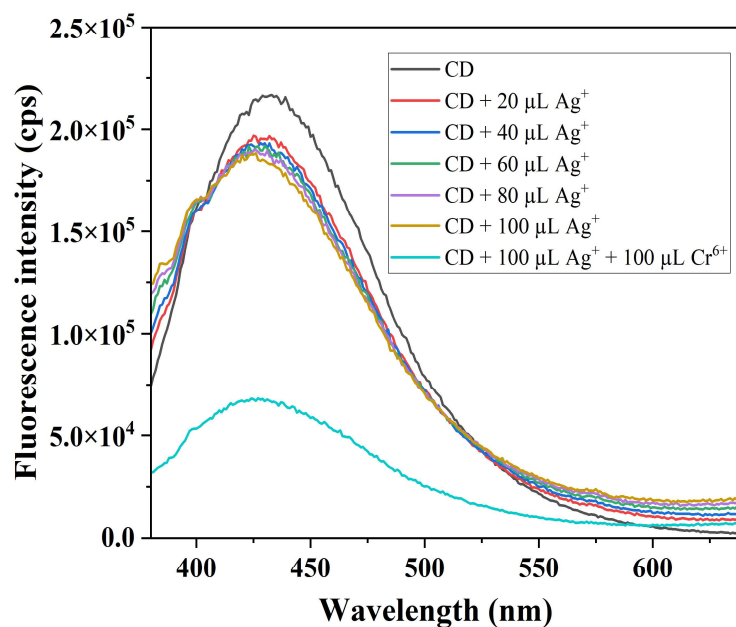

Figure S17. Fluorescence response of CDs upon addition of 100  $\mu\text{L}$  2mM  $\text{Ag}^+$  solution and 100  $\mu\text{L}$  2 mM  $\text{Cr}^{6+}$  solution ( $\lambda_{\text{ex}} = 350$  nm).

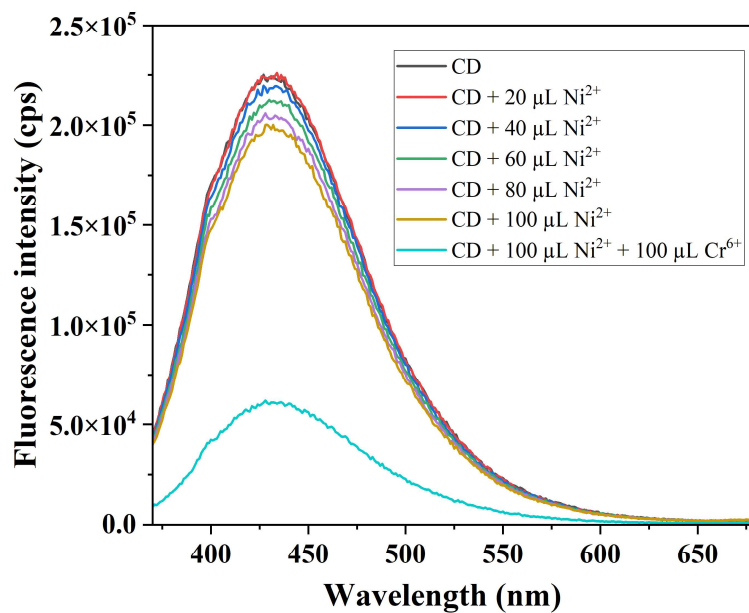

Figure S18. Fluorescence response of CDs upon addition of 100  $\mu\text{L}$  2mM  $\text{Ni}^{2+}$  solution and 100  $\mu\text{L}$  2 mM  $\text{Cr}^{6+}$  solution ( $\lambda_{\text{ex}} = 350$  nm).

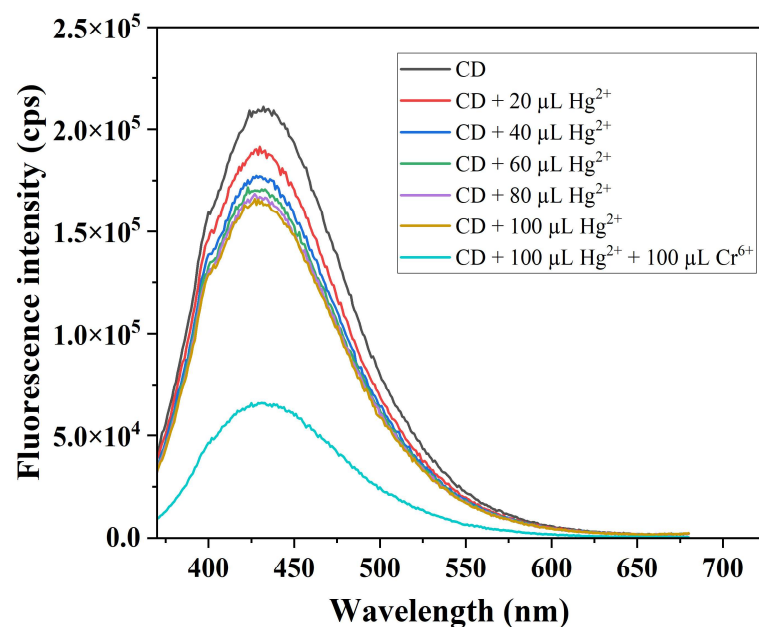

Figure S19. Fluorescence response of CDs upon addition of 100  $\mu\text{L}$  2mM  $\text{Hg}^{2+}$  solution and 100  $\mu\text{L}$  2 mM  $\text{Cr}^{6+}$  solution ( $\lambda_{\text{ex}} = 350$  nm).

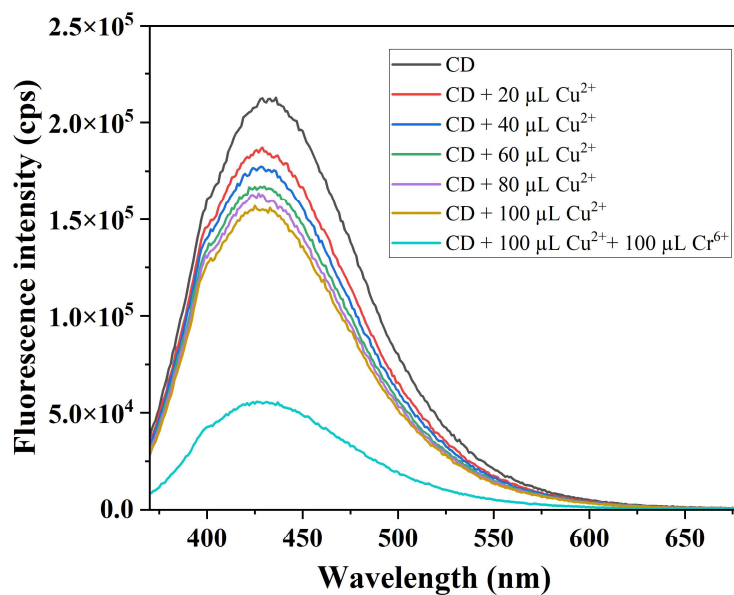

Figure S20. Fluorescence response of CDs upon addition of 100  $\mu\text{L}$  2mM  $\text{Cu}^{2+}$  solution and 100  $\mu\text{L}$  2 mM  $\text{Cr}^{6+}$  solution ( $\lambda_{\text{ex}} = 350$  nm).

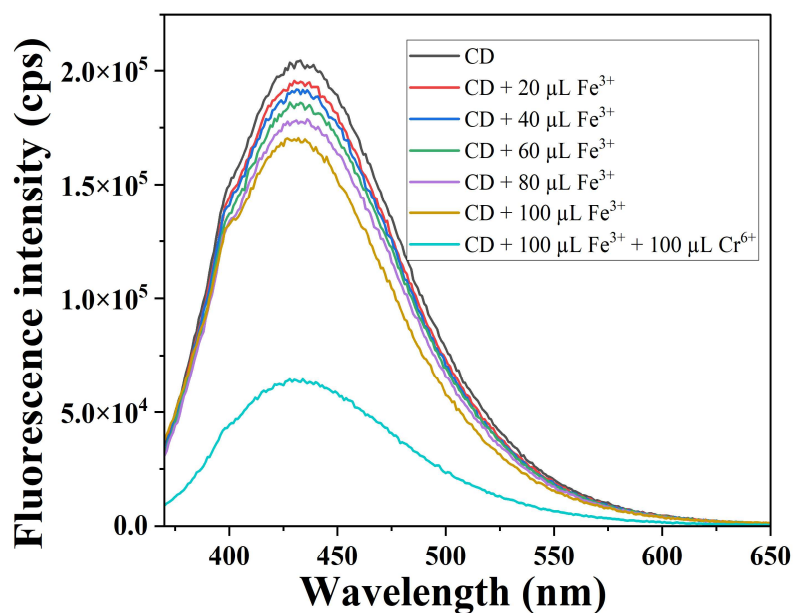

Figure S21. Fluorescence response of CDs upon addition of 100  $\mu\text{L}$  2mM  $\text{Fe}^{3+}$  solution and 100  $\mu\text{L}$  2 mM  $\text{Cr}^{6+}$  solution ( $\lambda_{\text{ex}} = 350$  nm).

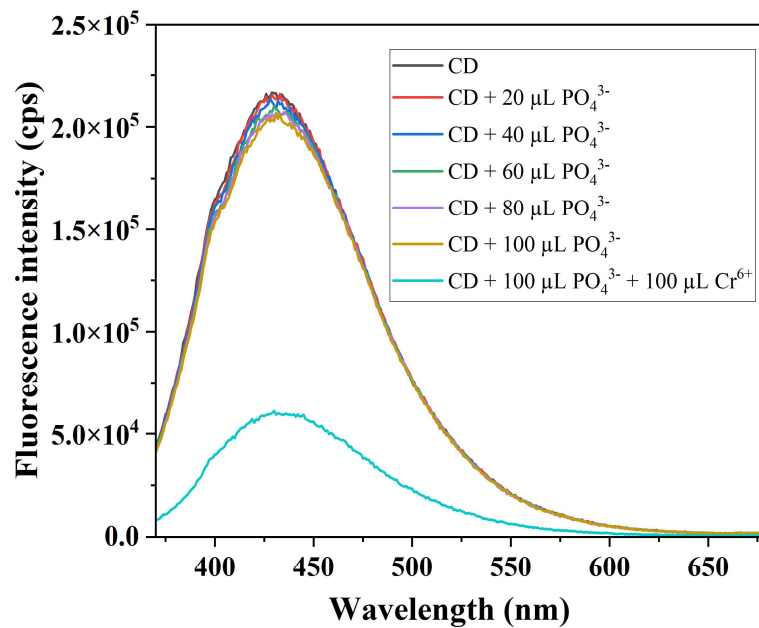

Figure S22. Fluorescence response of CDs upon addition of 100  $\mu\text{L}$  2mM  $\text{PO}_4^{3-}$  solution and 100  $\mu\text{L}$  2 mM  $\text{Cr}^{6+}$  solution ( $\lambda_{\text{ex}} = 350$  nm).

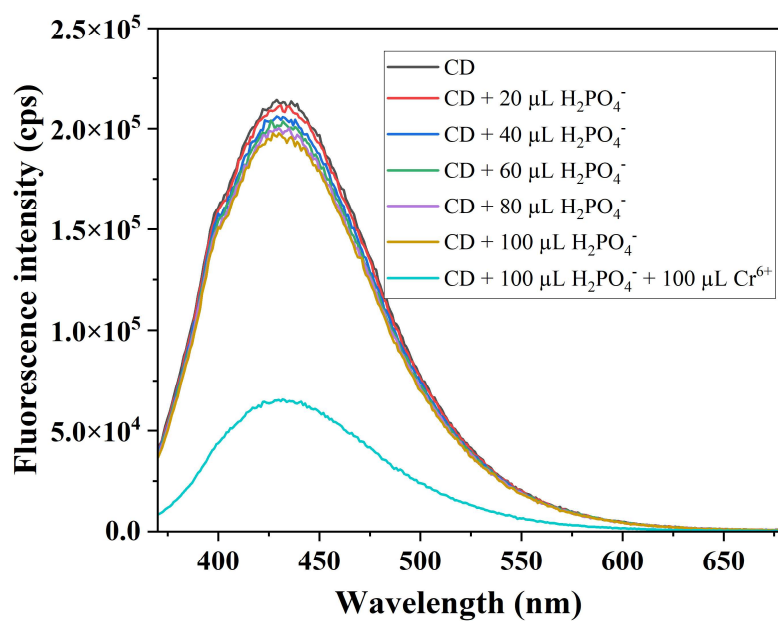

Figure S23. Fluorescence response of CDs upon addition of 100  $\mu\text{L}$  2mM  $\text{H}_2\text{PO}_4^-$  solution and 100  $\mu\text{L}$  2 mM  $\text{Cr}^{6+}$  solution ( $\lambda_{\text{ex}} = 350$  nm).

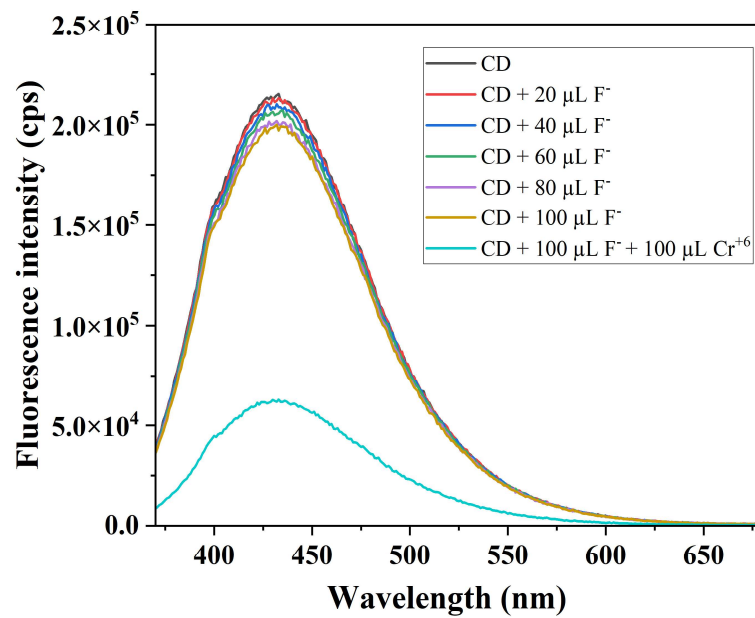

Figure S24. Fluorescence response of CDs upon addition of 100  $\mu\text{L}$  2mM  $\text{F}^-$  solution and 100  $\mu\text{L}$  2 mM  $\text{Cr}^{6+}$  solution ( $\lambda_{\text{ex}} = 350$  nm).

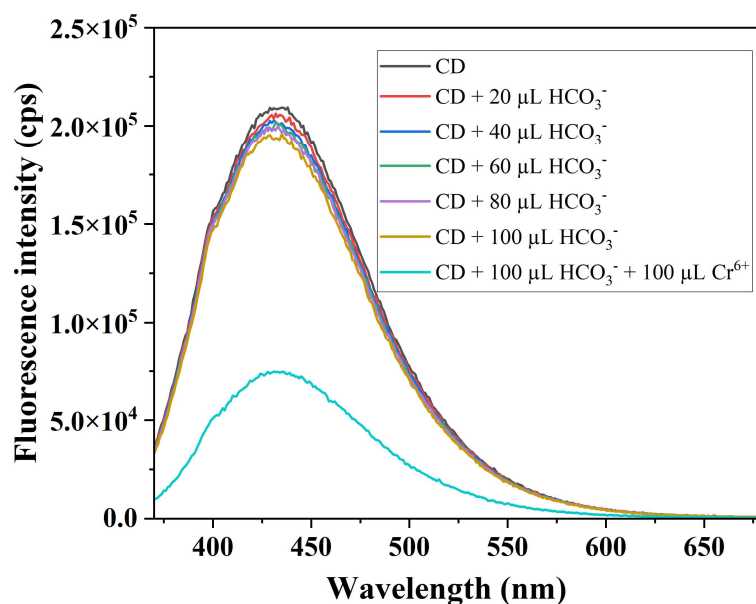

Figure S25. Fluorescence response of CDs upon addition of 100  $\mu\text{L}$  2mM  $\text{HCO}_3^-$  solution and 100  $\mu\text{L}$  2 mM  $\text{Cr}^{6+}$  solution ( $\lambda_{\text{ex}} = 350$  nm).

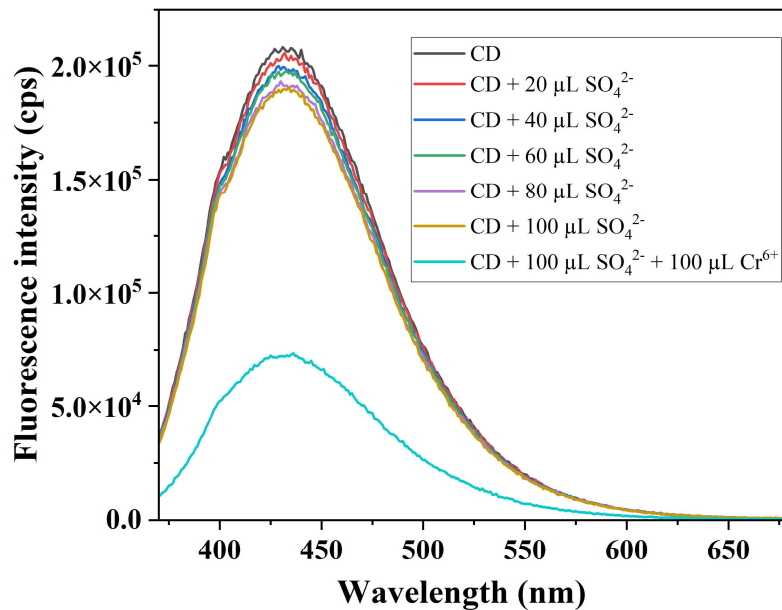

Figure S26. Fluorescence response of CDs upon addition of 100  $\mu\text{L}$  2mM  $\text{SO}_4^{2-}$  solution and 100  $\mu\text{L}$  2 mM  $\text{Cr}^{6+}$  solution ( $\lambda_{\text{ex}} = 350$  nm).

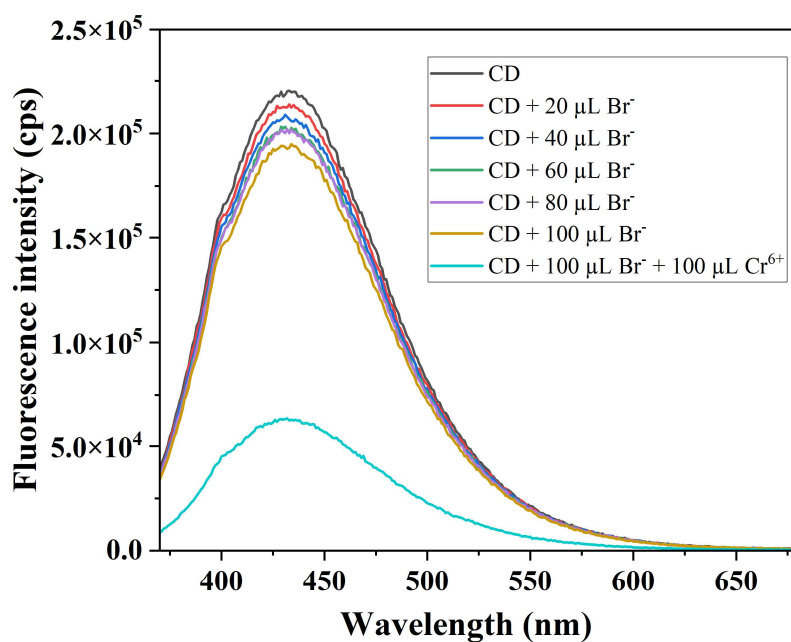

Figure S27. Fluorescence response of CDs upon addition of 100  $\mu\text{L}$  2mM  $\text{Br}^-$  solution and 100  $\mu\text{L}$  2 mM  $\text{Cr}^{6+}$  solution ( $\lambda_{\text{ex}} = 350$  nm).

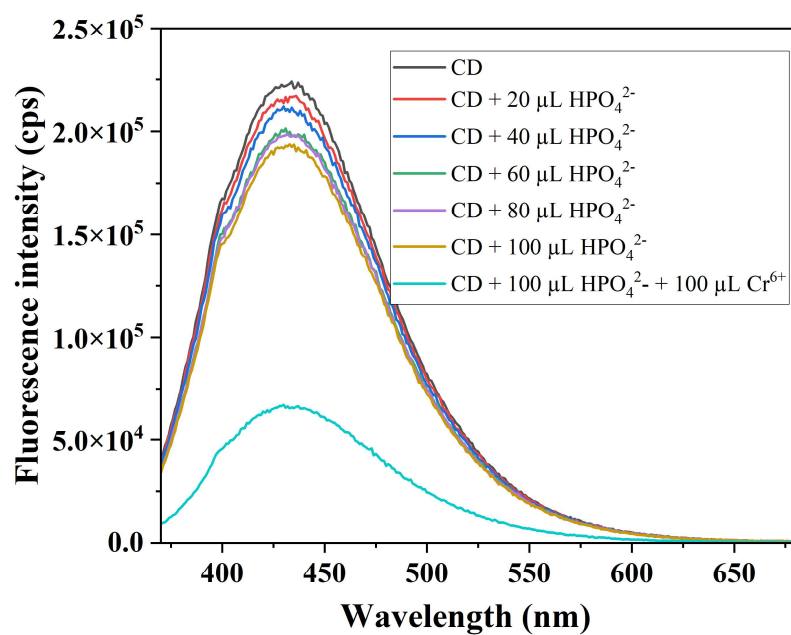

Figure S28. Fluorescence response of CDs upon addition of 100  $\mu\text{L}$  2mM  $\text{HPO}_4^{2-}$  solution and 100  $\mu\text{L}$  2 mM  $\text{Cr}^{6+}$  solution ( $\lambda_{\text{ex}} = 350$  nm).

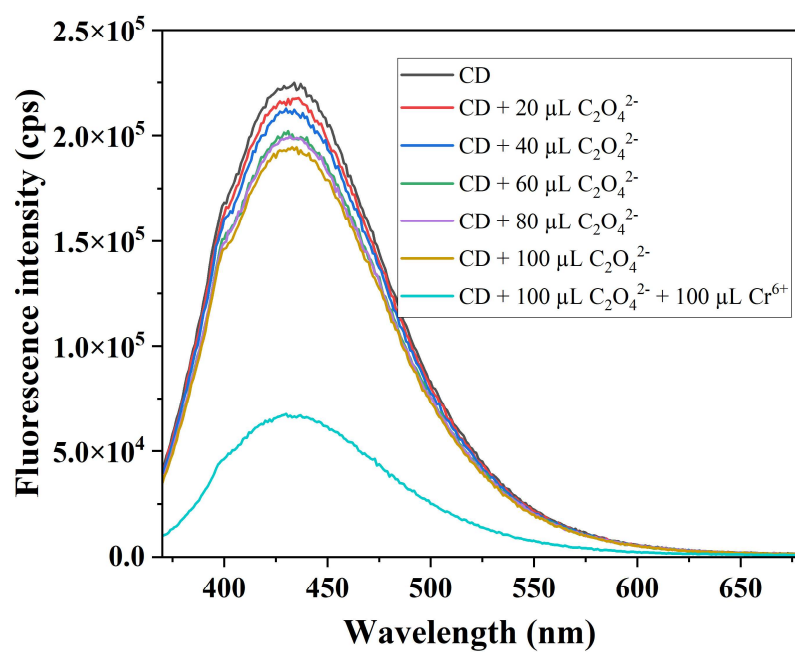

Figure S29. Fluorescence response of CDs upon addition of 100  $\mu\text{L}$  2mM  $\text{C}_2\text{O}_4^{2-}$  solution and 100  $\mu\text{L}$  2 mM  $\text{Cr}^{6+}$  solution ( $\lambda_{\text{ex}} = 350$  nm).

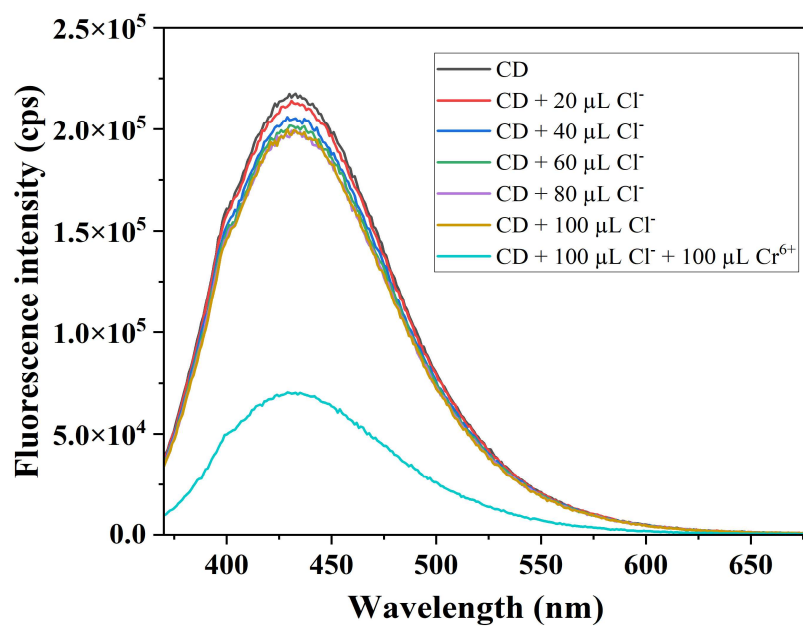

Figure S30. Fluorescence response of CDs upon addition of 100  $\mu\text{L}$  2mM  $\text{Cl}^-$  solution and 100  $\mu\text{L}$  2 mM  $\text{Cr}^{6+}$  solution ( $\lambda_{\text{ex}} = 350$  nm).

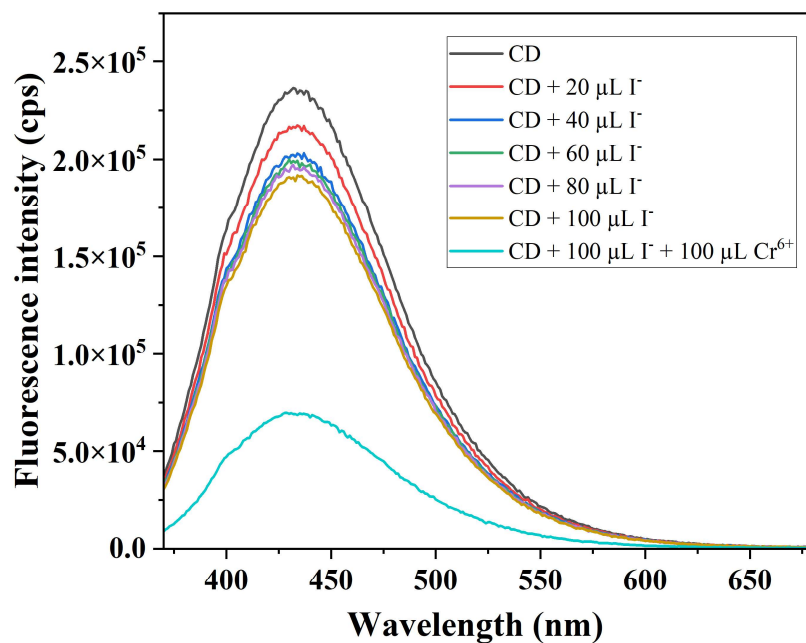

Figure S31. Fluorescence response of CDs upon addition of 100  $\mu L$  2mM  $I^-$  solution and 100  $\mu L$  2 mM  $Cr^{6+}$  solution ( $\lambda_{ex}$  = 350 nm).

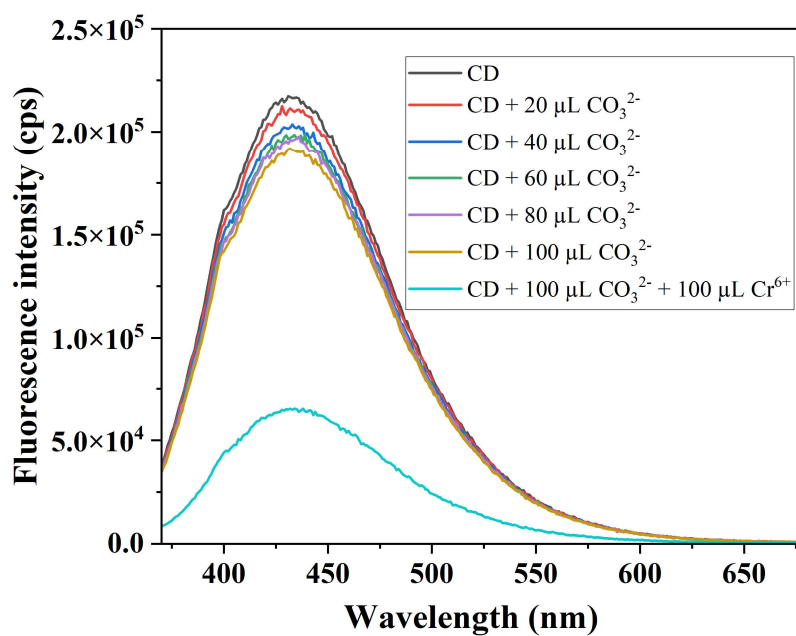

Figure S32. Fluorescence response of CDs upon addition of 100  $\mu L$  2mM  $CO_3^{2-}$  solution and 100  $\mu L$  2 mM  $Cr^{6+}$  solution ( $\lambda_{ex}$  = 350 nm).

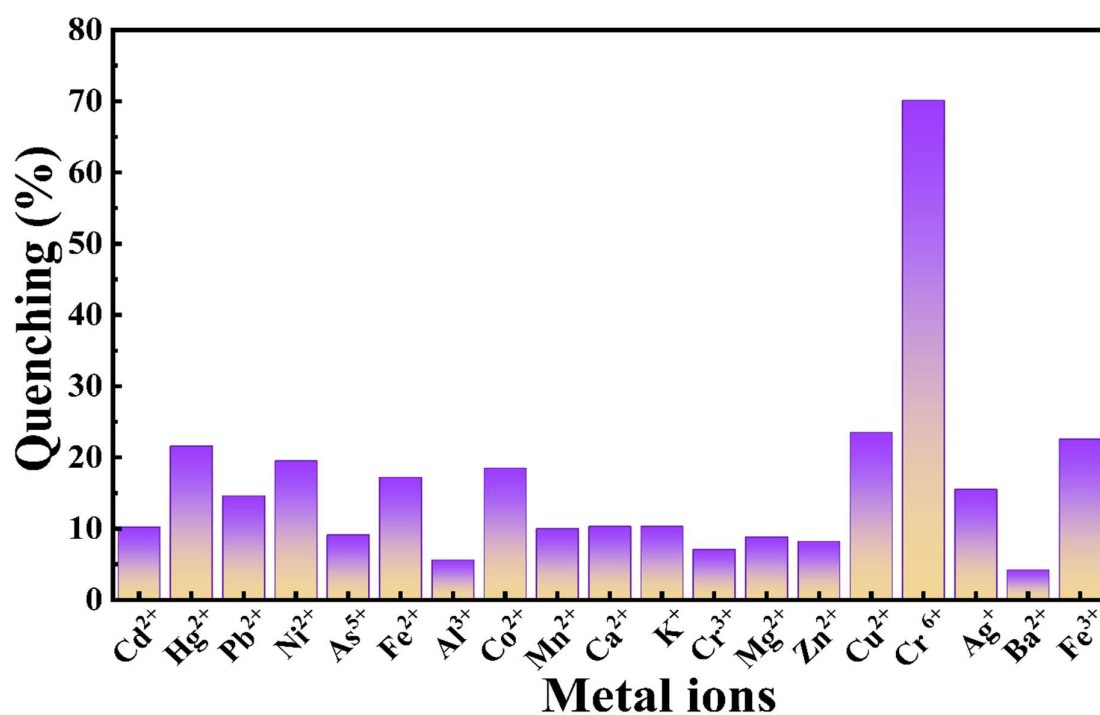

Figure S33. Percentage of fluorescence quenching in CDs upon addition of various metal ions.

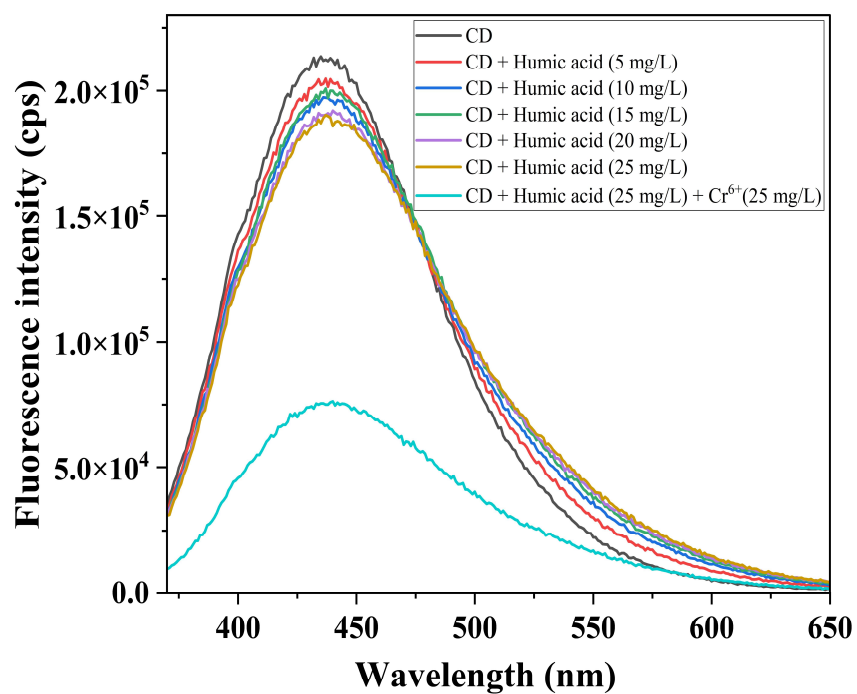

Figure S34. Fluorescence response of CDs upon addition of humic acid (25 mg/L) solution and  $\text{Cr}^{6+}$  (25 mg/L) solution ( $\lambda_{\text{ex}} = 350 \text{ nm}$ ).

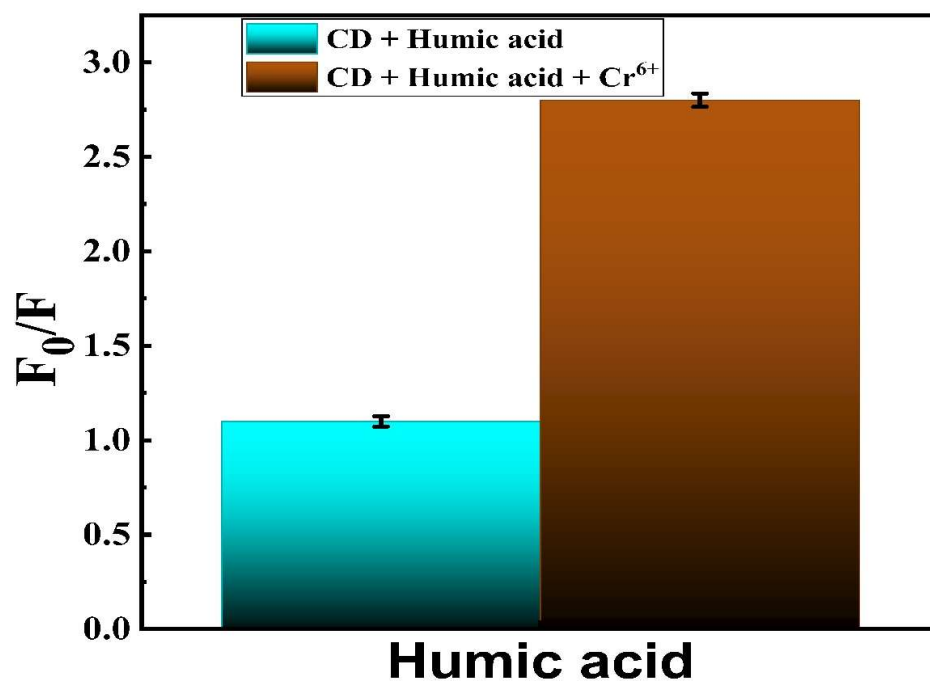

Figure S35. Interference study of humic acid in the sensing of  $\text{Cr}^{6+}$  by NB24@CDs.

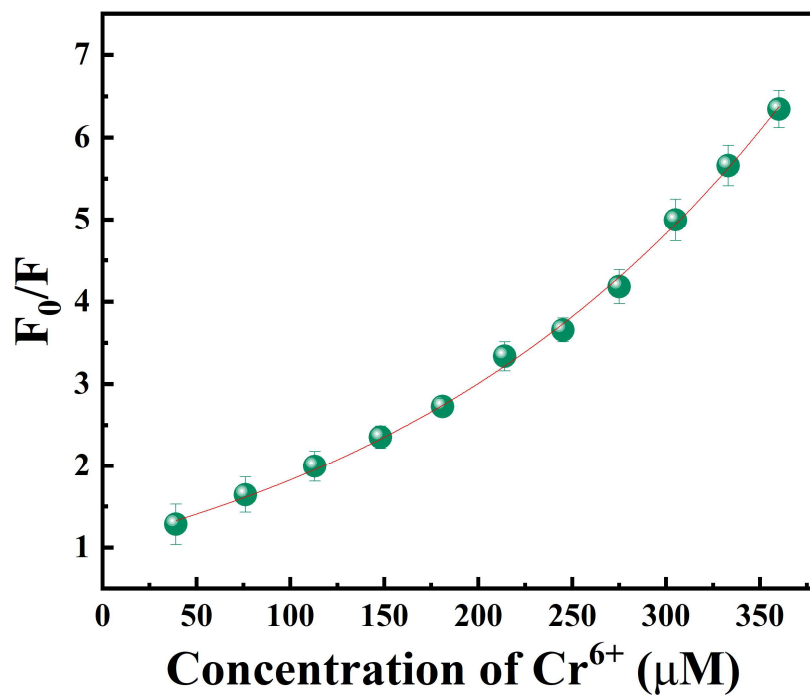

Figure S36. Stern-Volmer plot for fluorescence quenching of CDs against Cr<sup>6+</sup> concentration in micromolar.

| Temperature | $K_{SV}(\times 10^5 \text{ M}^{-1})$ | RSD (%) |
|-------------|--------------------------------------|---------|
| 25°C        | $6.20 \pm 0.18$                      | 2.6     |
| 35°C        | $5.40 \pm 0.16$                      | 3.1     |
| 55°C        | $4.20 \pm 0.17$                      | 3.9     |

Table S1.  $K_{SV}$  obtained from Stern-Volmer plots at different temperatures, indicating decreasing values with increasing temperatures (n = 3).

| Water type | Spiked (nM) | Recovered (nM) | Recovery % | RSD % |
|------------|-------------|----------------|------------|-------|
| Tap        | 39          | 37.908         | 97.2       | 1.98  |
|            | 77          | 74.767         | 97.1       | 2.17  |
|            | 113         | 111.305        | 98.5       | 1.56  |
|            | 148         | 146.372        | 98.9       | 1.92  |
|            | 181         | 183.353        | 101.3      | 3.12  |
| River      | 39          | 38.6217        | 99.03      | 2.55  |
|            | 77          | 75.922         | 98.6       | 2.69  |
|            | 113         | 111.644        | 98.8       | 1.37  |
|            | 148         | 147.112        | 99.4       | 3.02  |

|      |     |         |      |      |
|------|-----|---------|------|------|
|      | 181 | 180.276 | 99.6 | 2.12 |
| Lake | 39  | 38.103  | 97.7 | 1.06 |
|      | 77  | 75.383  | 97.9 | 1.82 |
|      | 113 | 110.514 | 97.8 | 2.07 |
|      | 148 | 146.076 | 98.7 | 1.84 |
|      | 181 | 179.19  | 99   | 2.94 |

Table S2. Determination of Cr<sup>6+</sup> in real samples using CDs as fluorescent probe (n = 3).

| Precursors                                                                                     | Method       | LOD             | Reference     |
|------------------------------------------------------------------------------------------------|--------------|-----------------|---------------|
| Lignocellulosic biomass (banana stem) and phosphoric acid                                      | Hydrothermal | 2.4 $\mu$ M     | <sup>1</sup>  |
| <i>Syzygium cumini</i> juice and betaine                                                       | Hydrothermal | 0.033 $\mu$ M   | <sup>2</sup>  |
| Cellulose acetate and p-phenylenediamine                                                       | Hydrothermal | 0.0303 $\mu$ M  | <sup>3</sup>  |
| Zinc acetate and cinnamon                                                                      | Hydrothermal | 3.97 $\mu$ g/mL | <sup>4</sup>  |
| Mature green leaves                                                                            | Hydrothermal | 0.004 mg/L      | <sup>5</sup>  |
| <i>Lycium barbarum</i>                                                                         | Hydrothermal | 0.16 $\mu$ M    | <sup>6</sup>  |
| Lignin, o-phenylenediamine, Nickel (II) chloride hexahydrate, EDTA-2Na                         | Hydrothermal | 0.17 $\mu$ M    | <sup>7</sup>  |
| (NH <sub>4</sub> ) <sub>2</sub> HPO <sub>4</sub> and m-phenylenediamine, and terephthalic acid | Solvothermal | 0.59 $\mu$ M    | <sup>8</sup>  |
| Tartaric acid and tryptophan                                                                   | Hydrothermal | 0.51 $\mu$ M    | <sup>9</sup>  |
| M-phenylenediamine and copper acetylacetonate                                                  | Solvothermal | 0.34 $\mu$ M    | <sup>10</sup> |
| O-phenylenediamine and copper acetylacetonate                                                  | Solvothermal | 0.4 $\mu$ M     | <sup>10</sup> |
| <b>This work</b>                                                                               | Hydrothermal | 30 nM           |               |

Table S3. Comparison of some recently published platforms for the detection of Cr<sup>6+</sup>.

## References

1. Goswami J, Rohman SS, Guha AK, Basyach P, Sonowal K, Borah SP, Saikia L, Hazarika P. Phosphoric acid assisted synthesis of fluorescent carbon dots from waste biomass for detection of Cr (VI) in aqueous media. *Materials chemistry and Physics.*, 2022, **286**, 126133.

2. Behera L, Naik AK, Sahu BB, Mohapatra S. Betaine-Modified Green Carbon Dot for Cr (VI) Sensing, in Vivo Cr (VI) Imaging, and Growth Promotion in the Rice Plant. *ACS Applied Bio Materials.*, 2024, **7**, 7624.
3. Li YF, Zhang X, Lu Q, Cao JZ, Gao S, Liu QZ, Cai XX, Zhao H. Cellulose-based yellow-green emitting carbon dots with large Stokes shift as effective “turn off-on” fluorescence platforms for Cr (VI) and AA dual efficacy detection. *Analytica Chimica Acta.*, 2024, **1324**, 343102.
4. Kolekar AG, Nille OS, Koparde SV, Patil AS, Waghmare RD, Sohn D, Anbhule PV, Kolekar GB, Gokavi GS, More VR. Green, facial zinc doped hydrothermal synthesis of cinnamon derived fluorescent carbon dots (Zn-Cn-CDs) for highly selective and sensitive Cr<sup>6+</sup> and Mn<sup>7+</sup> metal ion sensing application. *Spectrochimica Acta Part A: Molecular and Biomolecular Spectroscopy.*, 2024, **304**, 123413.
5. Patra S, Golder AK, Uppaluri RV. Green synthesis of carbon dots from mature green tea leaves for label-free fluorescence sensing of chromium (VI). *Optical Materials.*, 2024, **154**, 115767.
6. Xie J, Wu Z, Sun J, Lv C, Sun Q. Green synthesis of carbon quantum dots derived from Lycium barbarum for effective fluorescence detection of Cr (VI) sensing. *Journal of Fluorescence.*, 2024, **34**, 571.
7. Chen Y, Wang Z, Liang M, Liu Y, Dong W, Hu Q, Dong C, Gong X. High-efficient nickel-doped lignin carbon dots as a fluorescent and smartphone-assisted sensing platform for sequential detection of Cr (VI) and ascorbic acid. *International Journal of Biological Macromolecules.*, 2024, **274**, 133790.
8. Tian Y, Yue Y. Phosphor doped carbon dots with high photoluminescence and stability towards pH and Cr (VI) sensors. *Microchemical Journal.*, 2024, **207**, 112046.
9. Chen H, Li D, Zheng Y, Wang K, Zhang X, Zhou S, Wei S, Yong F, Nie J, Wen H, Wu J. Metal-free carbon-dots nanozyme with oxidase-like activity as photocatalysts for highly efficient detection/reduction of Cr (VI) and antibacterial application. *Separation and Purification Technology.*, 2025, **356**, 129852.
10. Hao X, Zhang X, Liu C, Yang P. Nanoarchitectonics of Cu-derived bright carbon dots towards Cr (VI) and tetracycline hydrochloride detection. *Applied Surface Science.*, 2025, **687**, 162217.
